# Supplementary material for: Investigation of Ni–Cu-acid multifunctional synergism in NiCu-phyllosilicate catalysts toward the 1,4-butynediol hydrogenation to 1,4-butanediol
Source: Royal Society of Chemistry journal article supplement (doi:10.1039/d3dt03076h), 2023-01-01
Supplement: d3dt03076h1.pdf [file d3dt03076h1.pdf]

## Supplementary Material for

### **Investigation of Ni-Cu-acid multifunctional synergism in NiCu-phyllsilicate catalysts toward 1,4-butyne-1,3-diol hydrogenation to 1,4-butanediol**

Changzhen Wang<sup>\*a</sup>, Xueqing Hai <sup>a</sup>, Jia Li <sup>a</sup>, Yupeng Liu <sup>a</sup>, Xiaosheng  
Yu<sup>a</sup>, Yongxiang Zhao<sup>\*a</sup>

a    Engineering Research Center of Ministry of Education for Fine Chemicals,  
Shanxi University, Taiyuan, 030006, China

\*Corresponding authors: czwang@sxu.edu.cn (C. Wang); yxzhao@sxu.edu.cn (Y.  
Zhao)

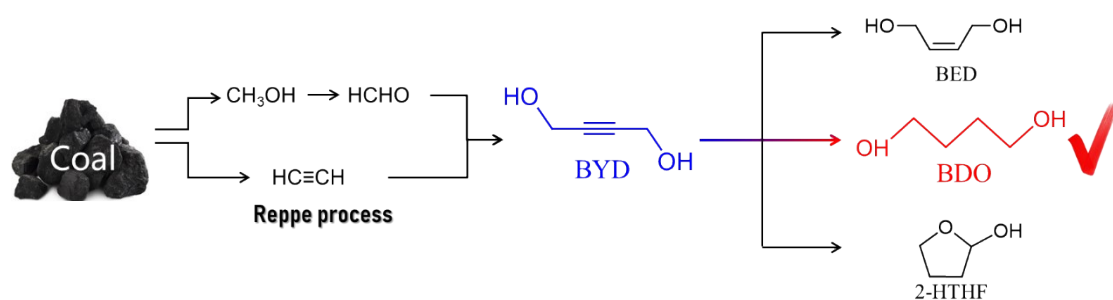

**Figure S1.** Schematic process for the hydrogenation of coal-based 1,4-butynediol and its products network.

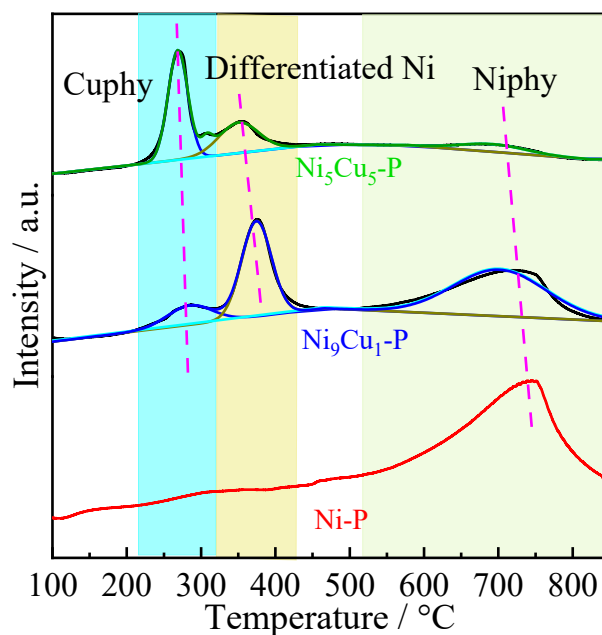

**Figure S2.** H<sub>2</sub>-TPR profiles of Ni-Cu-P catalysts.

**Note information:** H<sub>2</sub>-TPR profiles in Figure S2 provide the information about the Ni-Cu bimetallic synergy as well as the metal support interaction. Due to the distinct phyllosilicate structures of Ni-phyllosilicate (Niphy) and Cu-phyllosilicate (Cuphy), their reduction behaviors are significantly different. According to the former investigations from our and other groups, Cuphy only displayed a sharp peak centered at 290 °C, whereas Niphy displayed a sluggish reduction peak at a rather high and broad reduction temperature range centered at about 720 °C. For the bimetallic Ni<sub>9</sub>Cu<sub>1</sub>-P catalyst, an obvious three-stage reduction was observed. Notably, the first peak is attributed to the reduction of copper species, and another wide and high temperature reduction stage in the range of 550-800 °C can be designated to Niphy, indicating the stronger metal-support interactions in the phyllosilicate-derived NiCu-P, which can lead to higher metal dispersion and solvothermal-stability of the catalysts[1-2]. Interestingly, there was a new emerged reduction peak at 300-400 °C, which we believe is responsible for the highly active Ni species that differentiated from the Niphy matrix by the induction of promoting Cu species. In general, Cu<sup>2+</sup> is more easily reducible than Ni<sup>2+</sup> under similar conditions since it has much lower standard reduction potential[3], and over the Ni-Cu catalyst surface, the presence of Cu species can produce a large

amount of spillover hydrogen which is able to migrate to the adjacent  $\text{Ni}^{2+}$  sites and consequently accelerates the reduction/nucleation of the nearby Ni site and improves the reducibility of  $\text{Ni}^{2+}$  species at considerably lower temperatures[4]. As a result, the Ni species bonding to the nearby Cu site has a strong bimetallic synergy effect, and is more reducible at a rather low temperature for NiCu-P. However, as the increase of Cu/Ni ratios will by no means lead to the decline of total active Ni sites number, and  $\text{Ni}_9\text{Cu}_1\text{-P}$  showed the largest amount of Cu-induced  $\text{Ni}^0$  species differentiated from the Niphy matrix as shown in Figure S2, which may be responsible for its superior hydrogenation activity.

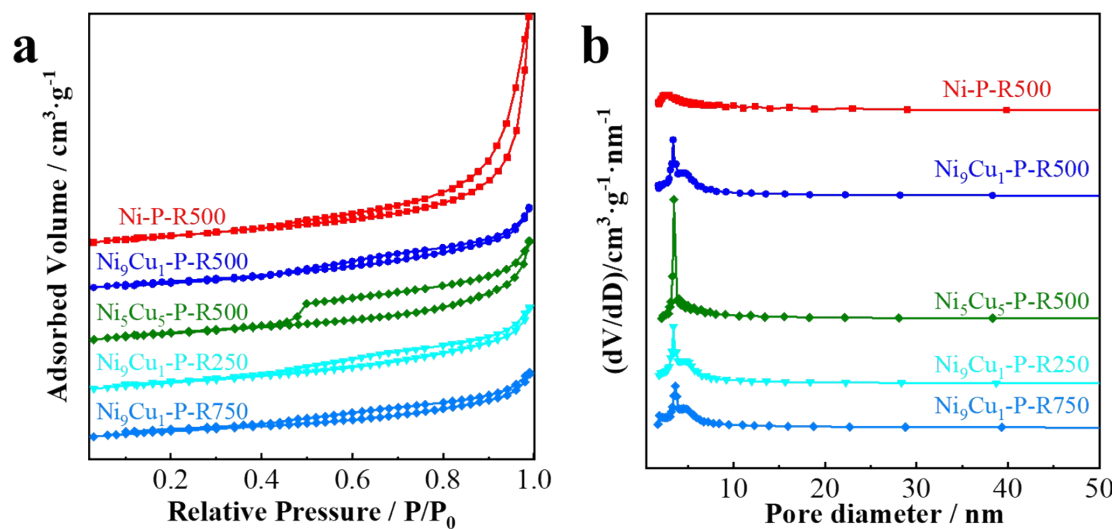

**Figure S3.** a)  $N_2$  adsorption-desorption isotherms and b) pore size distributions of different reduced catalysts.

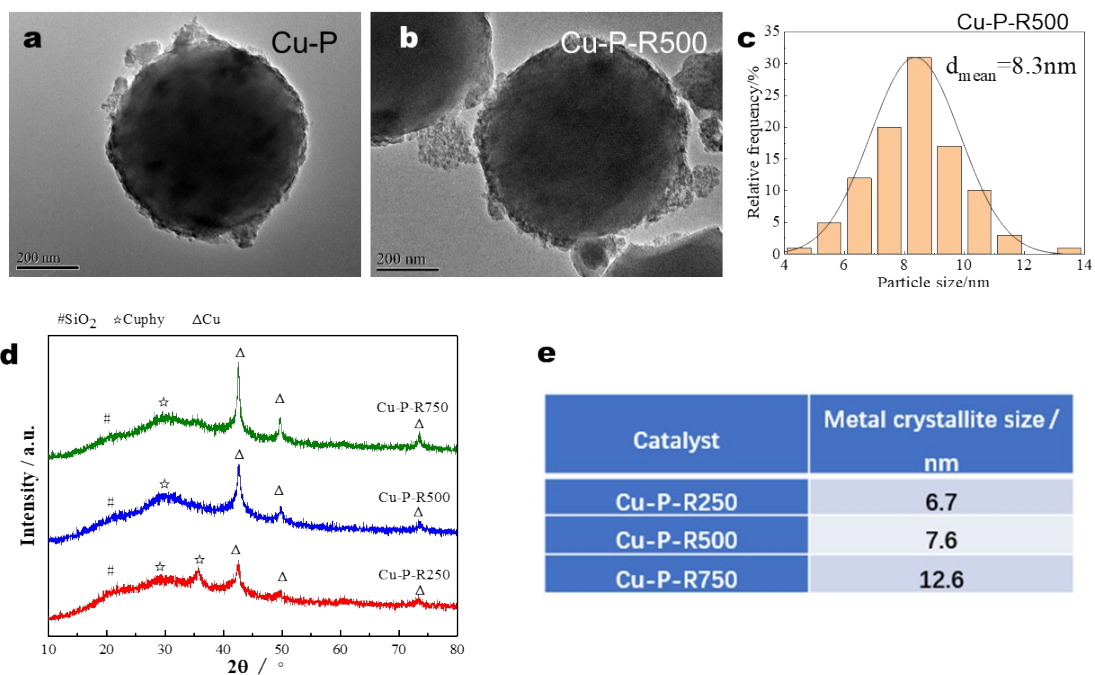

**Figure S4.** TEM images of a referential Cu-P catalyst a) calcined and b) reduced at 500 °C. c) the mean metal particle size of Cu-P-R500 calculated by counting for more than 100 of the reduced Cu nanoparticles. d) and e) XRD patterns and the corresponding Cu crystalline sizes of the reduced Cu-P catalysts.

**Table S1** Metal elemental and species compositions for Ni-Cu-P catalysts.

| Catalysts                          | Metal content <sup>a</sup> / wt% |      | Metal species composition according to  |           |             |
|------------------------------------|----------------------------------|------|-----------------------------------------|-----------|-------------|
|                                    |                                  |      | TPR peak fitting <sup>c</sup> / wt% (%) |           |             |
|                                    | Cu                               | Ni   | Cu from phy                             | Diff. Ni  | Ni from phy |
| Ni-P                               | 0                                | 15.9 | -                                       | -         | 15.9(100.0) |
| Ni <sub>9</sub> Cu <sub>1</sub> -P | 1.6                              | 15.0 | 1.8(10.7) <sup>b</sup>                  | 5.9(35.5) | 8.9(53.8)   |
| Ni <sub>5</sub> Cu <sub>5</sub> -P | 8.5                              | 7.8  | 9.1(56.0)                               | 5.0(31.2) | 2.1(12.8)   |

<sup>a</sup> The actual metal content was calculated by XRF.

<sup>b</sup> The data in parentheses is the metal species percentage integrated from the TPR peak fitting profiles.

<sup>c</sup> The metal species' composition is quantified according to their TPR percentage in the total metal content.

**Table S2.** Mean metal particle size at different reduction temperatures.

| Catalysts                          | Mean metal particle size / nm |      |      |
|------------------------------------|-------------------------------|------|------|
|                                    | R250                          | R500 | R750 |
| Ni-P                               | 6.3                           | 10.1 | 12.0 |
| Ni <sub>9</sub> Cu <sub>1</sub> -P | 5.8                           | 8.8  | 12.3 |
| Ni <sub>5</sub> Cu <sub>5</sub> -P | 3.5                           | 5.6  | 10.1 |

**Table S3** Textural property of the reduced catalysts.

| Catalysts                                | BET surface area<br>/cm <sup>2</sup> g <sup>-1</sup> | Pore volume<br>/cm <sup>3</sup> g <sup>-1</sup> | Pore diameter / nm |
|------------------------------------------|------------------------------------------------------|-------------------------------------------------|--------------------|
| Ni-P-R500                                | 128.1                                                | 0.29                                            | 9.2                |
| Ni <sub>9</sub> Cu <sub>1</sub> -P- R500 | 117.1                                                | 0.26                                            | 8.7                |
| Ni <sub>5</sub> Cu <sub>5</sub> -P- R500 | 129.3                                                | 0.31                                            | 9.6                |
| Ni <sub>9</sub> Cu <sub>1</sub> -P- R250 | 117.0                                                | 0.28                                            | 8.7                |
| Ni <sub>9</sub> Cu <sub>1</sub> -P- R750 | 114.4                                                | 0.21                                            | 7.2                |

**Table S4** Catalyst activity and selectivity tests for BYD hydrogenation over Cu-P-Rx catalysts.

| Catalyst  | Conversion / % | Product selectivity / % |     |      |        |
|-----------|----------------|-------------------------|-----|------|--------|
|           |                | BDO                     | BED | HTHF | Others |
| Cu-P-R250 | 0              | -                       | -   | -    | -      |
| Cu-P-R500 | 1.5            | 0                       | 100 | 0    | 0      |
| Cu-P-R750 | 0              | -                       | -   | -    | -      |

**Table S5** The peak temperature and desorbed H<sub>2</sub> amount for NiCu-P catalysts.

| Catalysts                               | Peak temperature / °C |            | Amount of desorbed<br>H <sub>2</sub> / mmol g <sup>-1</sup> |
|-----------------------------------------|-----------------------|------------|-------------------------------------------------------------|
|                                         | $\alpha$ -H           | $\beta$ -H |                                                             |
| Ni-P-R250                               | 82                    | -          | 0.06                                                        |
| Ni-P-R500                               | 76                    | -          | 0.08                                                        |
| Ni-P-R750                               | 74                    | -          | 0.10                                                        |
| Ni <sub>9</sub> Cu <sub>1</sub> -P-R250 | 81                    | 122        | 0.09                                                        |
| Ni <sub>9</sub> Cu <sub>1</sub> -P-R500 | 79                    | 109        | 0.12                                                        |
| Ni <sub>9</sub> Cu <sub>1</sub> -P-R750 | 76                    | -          | 0.05                                                        |
| Ni <sub>5</sub> Cu <sub>5</sub> -P-R250 | 81                    | 124        | 0.09                                                        |
| Ni <sub>5</sub> Cu <sub>5</sub> -P-R500 | 78                    | 113        | 0.06                                                        |
| Ni <sub>5</sub> Cu <sub>5</sub> -P-R750 | 75                    | -          | 0.05                                                        |

**Table S6** Peak profiles and total acidity for NiCu-P catalysts according to NH<sub>3</sub>-TPD results.

| Catalysts                               | Peak temperature / °C |                    | Total acidity /<br>umol g <sup>-1</sup> |
|-----------------------------------------|-----------------------|--------------------|-----------------------------------------|
|                                         | Weak acid             | Medium strong acid |                                         |
| Ni-P-R250                               | 104                   | -                  | 1.4                                     |
| Ni-P-R500                               | 93                    | 265                | 0.82                                    |
| Ni-P-R750                               | 92                    | -                  | 0.39                                    |
| Ni <sub>9</sub> Cu <sub>1</sub> -P-R250 | 103                   | -                  | 1.38                                    |
| Ni <sub>9</sub> Cu <sub>1</sub> -P-R500 | 91                    | 248                | 0.75                                    |
| Ni <sub>9</sub> Cu <sub>1</sub> -P-R750 | 94                    | -                  | 0.43                                    |
| Ni <sub>5</sub> Cu <sub>5</sub> -P-R250 | 108                   | -                  | 2.62                                    |
| Ni <sub>5</sub> Cu <sub>5</sub> -P-R500 | 98                    | 231                | 0.67                                    |
| Ni <sub>5</sub> Cu <sub>5</sub> -P-R750 | 102                   | -                  | 0.46                                    |

**Table S7** Metal elemental composition of the fresh and spent catalysts after the cycling tests.

| Catalysts                                       | Metal content <sup>a</sup> |          |
|-------------------------------------------------|----------------------------|----------|
|                                                 | Ni / wt%                   | Cu / wt% |
| Ni-P-fresh                                      | 15.9                       | -        |
| Ni-P-1-time-usage                               | 15.8                       | -        |
| Ni <sub>9</sub> Cu <sub>1</sub> -P-fresh        | 15.0                       | 1.6      |
| Ni <sub>9</sub> Cu <sub>1</sub> -P-3-time-usage | 15.2                       | 1.5      |
| Ni <sub>9</sub> Cu <sub>1</sub> -P-6-time-usage | 14.9                       | 1.6      |
| Ni <sub>5</sub> Cu <sub>5</sub> -fresh          | 7.8                        | 8.5      |
| Ni <sub>5</sub> Cu <sub>5</sub> -P-1-time-usage | 7.6                        | 8.3      |

<sup>a</sup> The metal content was detected by XRF results.

## References

1. Kong X; Zhu Y; Zheng H; Li X; Zhu Y; Li Y-W, Ni nanoparticles inlaid nickel phyllosilicate as a metal–acid bifunctional catalyst for low-temperature hydrogenolysis reactions. *ACS Catalysis* **2015**, 5 (10), 5914-5920.
2. Sasaki T; Ichikuni N; Hara T; Shimazu S, Study on the promoting effect of nickel silicate for 1-phenylethanol oxidation on supported nio nanocluster catalysts. *Catalysis Today* **2018**, 307, 29-34.
3. Pendem S; Mondal I; Shrotri A; Rao B S; Lingaiah N; Mondal J, Unraveling the structural properties and reactivity trends of cu–ni bimetallic nanoalloy catalysts for biomass-derived levulinic acid hydrogenation. *Sustainable Energy & Fuels* **2018**, 2 (7), 1516-1529.
4. Ashok J; Kathiraser Y; Ang M L; Kawi S, Ni and/or ni-cu alloys supported over sio<sub>2</sub> catalysts synthesized via phyllosilicate structures for steam reforming of biomass tar reaction. *Catalysis Science & Technology* **2015**, 5 (9), 4398-4409.
